# Supplementary material
Source: Royal Society of Chemistry journal article supplement (doi:10.1039/d6cp00338a)
Supplement: d6cp00338a1.pdf [file d6cp00338a1.pdf]

**Supplementary material**

Energetically Quasi-Integrable Roaming in the Ionized  $\text{CH}_4 + \text{CO}$   
System: Nonequilibrium Dynamics of Acetaldehyde Formation

Toshiaki Matsubara\*

Department of Chemistry, Faculty of Science, Kanagawa University,  
3-27-1, Rokkakubashi, Kanagawa-ku, Yokohama 221-8686, Japan

1. **Note S1.** NBO charges, overlap integrals, and bond populations
2. **Note S2.** Sequential  $\text{CH}_3\cdots\text{HCO}^+$  and  $\text{CH}_4^+\cdots\text{CO}$  roaming dynamics
3. **Fig. S3.** Relative translational kinetic energy
4. **Fig. S4.** Scatter plot of the C–C distance versus the relative translational kinetic energy
5. Cartesian coordinates of the optimized structures.

## Note S1. NBO charges, overlap integrals, and bond populations.

Fig. S1 presents the time evolution of electronic descriptors along a representative MD trajectory leading to  $\text{CH}_3\text{CHO}^+$  formation. Panels (a) and (b) show the NBO charges of the relevant fragments during the  $\text{CH}_4^+\cdots\text{CO}$  roaming regime and the subsequent  $\text{CH}_3\cdots\text{HCO}^+$  roaming regime, respectively. During the  $\text{CH}_4^+\cdots\text{CO}$  roaming stage, the charge distribution remains largely localized on the  $\text{CH}_4^+$  fragment, with only minor charge fluctuations on both fragments. In contrast, during the  $\text{CH}_3\cdots\text{HCO}^+$  roaming stage, the charge distribution becomes significantly localized on the  $\text{HCO}^+$  fragment, exhibiting noticeable changes as the hydrogen atom approaches the CO fragment.

Panel (c) shows the time-dependent overlap integral between carbon-centered orbitals. The overlap remains negligible during the  $\text{CH}_4^+\cdots\text{CO}$  roaming regime but increases intermittently during the  $\text{CH}_3\cdots\text{HCO}^+$  roaming stage, indicating repeated transient C–C orbital interactions. Panel (d) displays the corresponding C–C bond population. During the  $\text{CH}_4^+\cdots\text{CO}$  roaming regime, the bond population remains close to zero, whereas during the  $\text{CH}_3\cdots\text{HCO}^+$  roaming regime it exhibits pronounced fluctuations, reflecting intermittent changes in the C–C electronic interaction as the two carbon centers approach each other along the roaming trajectory.

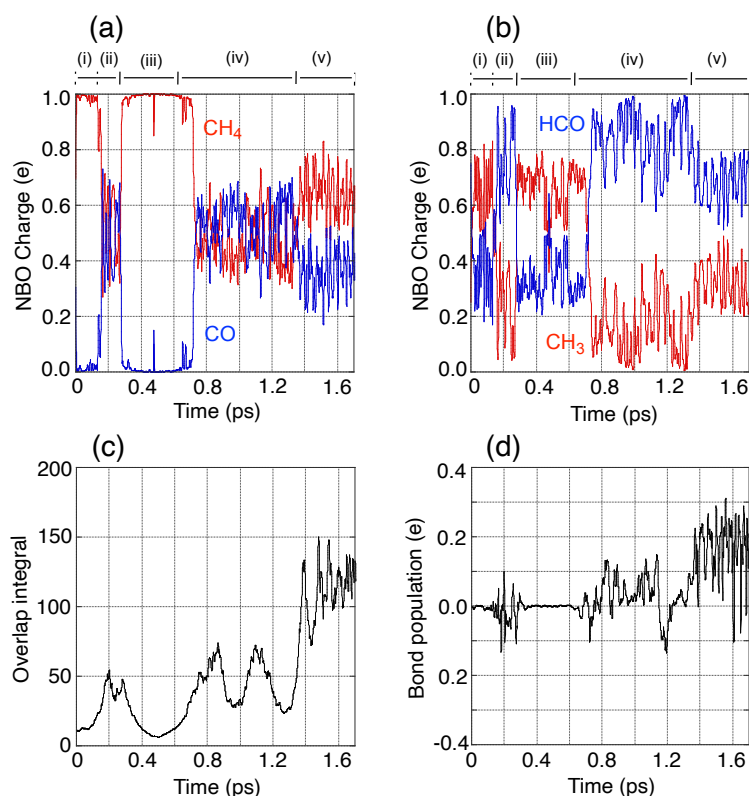

**Fig. S1** Time evolution of electronic structure descriptors along a representative MD trajectory leading to  $\text{CH}_3\text{CHO}^+$  formation during the  $\text{CH}_4^+\cdots\text{CO}$  roaming regime and the subsequent  $\text{CH}_3\cdots\text{HCO}^+$  roaming regime. Panels (a) and (b) show the NBO charges of the fragments, panel (c) shows the overlap integral between carbon-centered orbitals associated with the C–C interaction, and panel (d) shows the corresponding C–C bond population.

## Note S2. Sequential $\text{CH}_3\cdots\text{HCO}^+$ and $\text{CH}_4^+\cdots\text{CO}$ roaming dynamics.

Fig. S2 presents a representative trajectory illustrating post-formation roaming dynamics following the initial formation of  $\text{CH}_3\text{CHO}^+$ . In this analysis, we focus exclusively on the roaming segments that occur after the first formation of  $\text{CH}_3\text{CHO}^+$ ; the final dissociation into  $\text{CH}_3 + \text{CHO}^+$ , although observed in the trajectory, is not discussed in detail here. Following the exothermic formation of  $\text{CH}_3\text{CHO}^+$ , the system enters an initial  $\text{CH}_3\cdots\text{HCO}^+$  roaming regime in region (i), which is followed by re-formation of  $\text{CH}_3\text{CHO}^+$  in region (ii) (panel (a)). The system then re-enters a second  $\text{CH}_3\cdots\text{HCO}^+$  roaming regime in region (iii). During this stage, both fragments exhibit large-amplitude translational motion; nevertheless, dissociation does not occur, and the fragments remain dynamically correlated throughout the roaming motion. Notably, in the  $\text{CH}_3\cdots\text{HCO}^+$  roaming regimes observed after  $\text{CH}_3\text{CHO}^+$  formation, kinetic energy is redistributed toward the  $\text{HCO}^+$  fragment through H-atom motion within  $\text{CH}_3\text{CHO}^+$  (panel (b)). Despite this redistribution, the system remains in an energetically decoupled roaming state, and dissociation does not occur.

Subsequently, the system evolves into a  $\text{CH}_4^+\cdots\text{CO}$  roaming regime in region (iv) (panel (a)), representing a qualitatively different roaming regime. This transition is accompanied by a pronounced redistribution of kinetic energy between the fragments, where the kinetic energy of the CO fragment becomes strongly suppressed (panel (b)), remaining small and nearly constant. As a result, the fragments exhibit slow roaming motion, characteristic of a dynamically stabilized roaming state.

To further characterize the nature of the two roaming regimes, we analyzed the energetic behavior and electronic coupling between the fragments in both the  $\text{CH}_3\cdots\text{HCO}^+$  and  $\text{CH}_4^+\cdots\text{CO}$  roaming states. In both regimes, the sum of potential and kinetic energies (PE + KE) of each fragment remains nearly constant over time (panel (c) and (d)), indicating limited energy exchange between the fragments. Consistently, the overlap integrals (panel (e)) and bond populations (panel (f)) between the fragments are small and remain nearly constant throughout the roaming periods, reflecting weak electronic coupling. These results indicate that both roaming regimes correspond to transiently energetically decoupled, quasi-integrable fragment motions.

Analysis of the interaction energy (panels (g) and (h)) reveals distinct correlations in the two roaming regimes. In the  $\text{CH}_3\cdots\text{HCO}^+$  roaming regime, the temporal variation of the interaction energy closely follows the energy fluctuations of the  $\text{HCO}^+$  fragment, whereas in the  $\text{CH}_4^+\cdots\text{CO}$  roaming regime, it correlates with the energy fluctuations of the  $\text{CH}_4^+$  fragment. This indicates that, in the  $\text{CH}_3\cdots\text{HCO}^+$  roaming regime, the strength of the interfragment interaction is primarily governed by the energy of the  $\text{HCO}^+$  fragment rather than that of the  $\text{CH}_3$  fragment, suggesting that the  $\text{HCO}^+$  fragment acts as the primary mediator of the residual interfragment coupling. In contrast, in the  $\text{CH}_4^+\cdots\text{CO}$  roaming regime, the interfragment interaction is predominantly controlled by the energy of the  $\text{CH}_4^+$  fragment rather than that of the CO fragment. These marginal energetic couplings between the fragments provide a plausible physical basis for the persistence of the long-lived roaming motion.

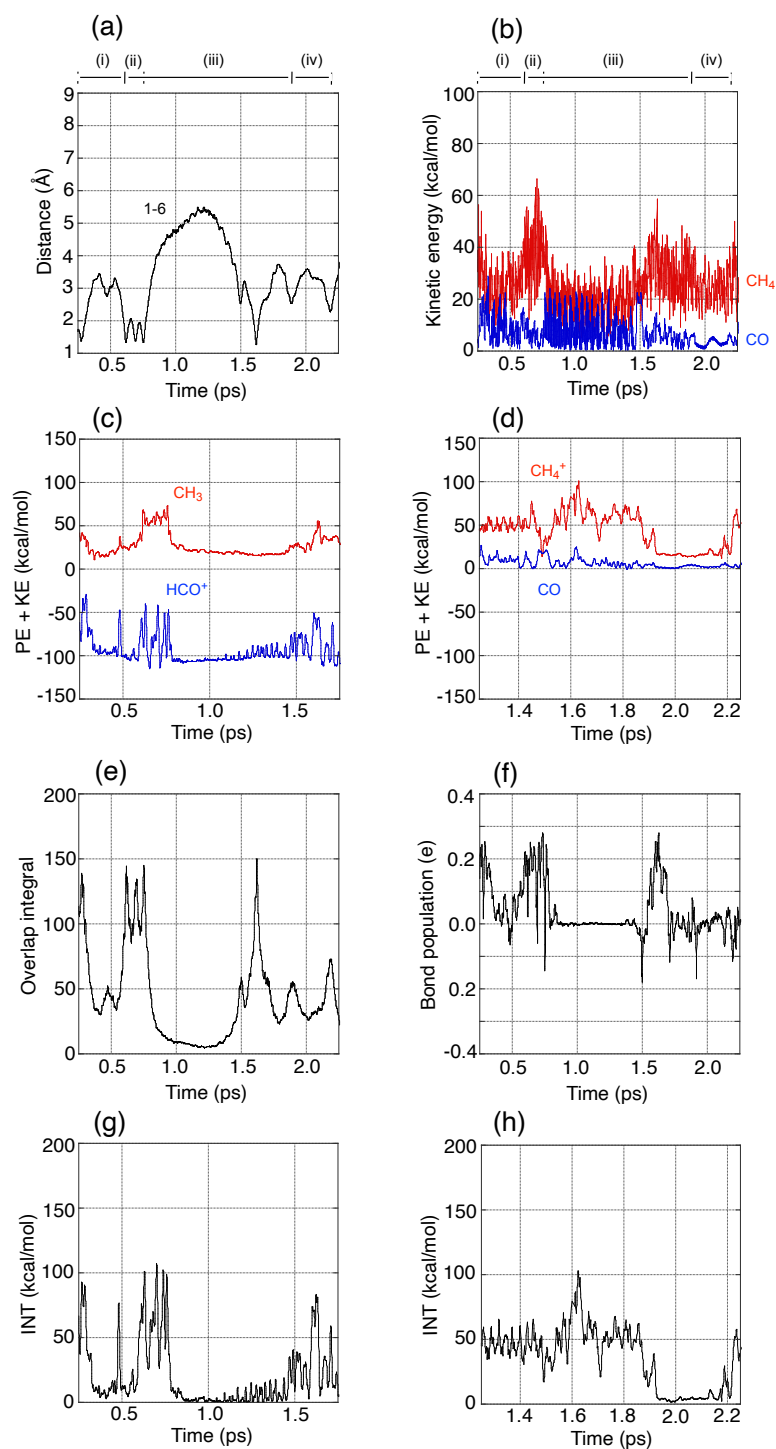

**Fig. S2** Time evolution of a representative trajectory showing sequential  $\text{CH}_3\cdots\text{HCO}^+$  and  $\text{CH}_4^+\cdots\text{CO}$  roaming following the initial formation of  $\text{CH}_3\text{CHO}^+$ . Panel (a) shows the  $\text{C}^1\text{-C}^6$  distance; panel (b) shows the kinetic energy of each fragment; panels (c) and (d) show the sum of potential and kinetic energies (PE + KE) for each fragment; panel (e) shows the overlap integral between carbon-centered orbitals associated with the C-C interaction; panel (f) shows the corresponding C-C bond population; panels (g) and (h) show the interaction energies (INT) for the  $\text{CH}_3\cdots\text{HCO}^+$  and  $\text{CH}_4^+\cdots\text{CO}$  pairs, respectively.  $\text{CH}_3\cdots\text{HCO}^+$  roaming first occurs in region (i), followed by re-formation of  $\text{CH}_3\text{CHO}^+$

in region (ii). In region (iii),  $\text{CH}_3\cdots\text{HCO}^+$  roaming occurs twice, with transient re-formation of  $\text{CH}_3\text{CHO}^+$  along the pathway. In region (iv),  $\text{CH}_4^+\cdots\text{CO}$  roaming is observed.

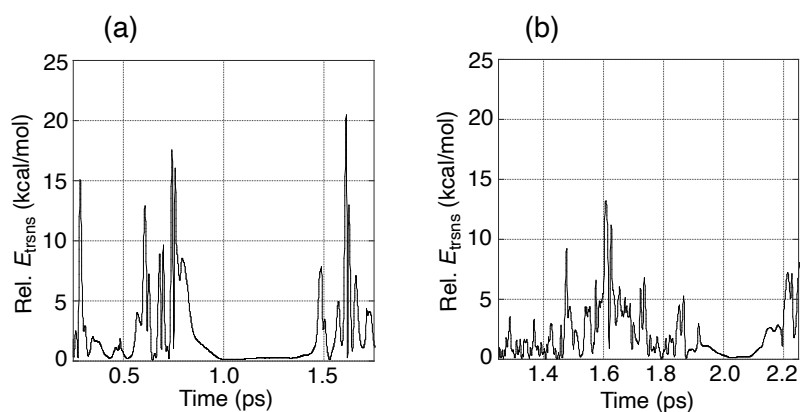

**Fig. S3** Relative translational kinetic energy between (a)  $\text{CH}_3$  and  $\text{HCO}$  and (b)  $\text{CH}_4$  and  $\text{CO}$  as functions of time along the representative trajectory presented in Fig. S2.

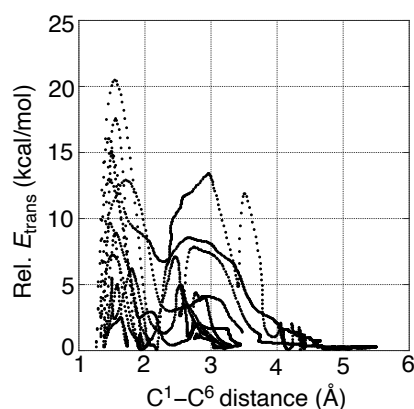

**Fig. S4** Relation between the interfragment  $\text{C}^1\text{--C}^6$  distance and the relative translational kinetic energy  $\text{Rel. } E_{\text{trans}}$  for the representative  $\text{CH}_3\cdots\text{HCO}$  roaming trajectory presented in Fig. S2. The data points correspond to time steps belonging to the large-amplitude roaming excursion. As in the  $\text{CH}_4\cdots\text{CO}$  roaming case, the relative translational kinetic energy approaches near-zero values at large separations, consistent with transient dynamical decoupling between the fragments.

Cartesian coordinates (in Å)

**1**

C -2.918114 0.024130 0.000020  
H -3.840026 -0.419961 -0.367029  
H -3.115801 0.551894 0.929648  
H -2.533578 0.723293 -0.738411  
H -2.181689 -0.755731 0.175067  
C 1.472330 -0.207679 0.000447  
O 2.543225 0.125225 -0.000259

**2**

C 2.084349 -0.000199 0.000066  
H 2.220574 -0.738101 0.782057  
H 2.213007 -0.311943 -1.029984  
H 2.226541 1.045801 0.244731  
H 0.478425 0.002317 0.000662  
C -0.773270 0.001218 0.000107  
O -1.875628 -0.000523 0.000187

**3**

C 1.172992 -0.150318 -0.000003  
H 1.162747 -1.234954 -0.000311  
H 1.651296 0.270276 -0.889701  
H 1.651003 0.269767 0.890082  
C -0.233950 0.395551 -0.000006  
O -1.212318 -0.284363 -0.000000  
H -0.400750 1.498420 -0.000015

**5**

C -0.219138 0.000181 0.000121  
O -1.325804 -0.000063 -0.000025  
C 1.212991 -0.000037 -0.000077  
H 1.547377 -0.892739 -0.538169  
H 1.547821 0.912378 -0.503747  
H 1.548117 -0.020000 1.041854

**7**

C 0.029767 0.459022 -0.000040  
C -1.213336 -0.199217 -0.000018  
H -2.122307 0.385852 -0.000232

H -1.278202 -1.280798 0.000412  
H 0.108470 1.541808 0.000282  
O 1.158600 -0.136696 0.000019  
H 1.124651 -1.112117 -0.000262

**8**

C -1.228838 -0.175325 0.000019  
C 0.030727 0.442468 0.000014  
H -1.295636 -1.255707 -0.000072  
H -2.123605 0.430231 -0.000212  
H 0.148886 1.522916 0.000121  
O 1.067516 -0.308286 0.000052  
H 1.918887 0.165992 -0.000450

**9**

C -1.234672 -0.093825 -0.000054  
C 0.115826 0.408735 -0.000047  
O 1.180795 -0.209682 0.000002  
H 2.006615 0.323977 0.000049  
H -1.744716 0.326516 -0.874961  
H -1.743132 0.323175 0.877375  
H -1.252054 -1.185678 -0.001869

**TS1**

C -1.919517 -0.128368 -0.000478  
H -2.374464 0.851706 0.071820  
H -1.867912 -0.609005 -0.967503  
H -1.843071 -0.732016 0.892962  
O 1.616368 -0.303037 0.000071  
C 0.798404 0.438545 0.000597  
H -0.118820 1.052548 0.001438

**TS2**

C -0.217576 0.593226 -0.000177  
C 1.071500 -0.097449 0.000029  
O -0.981401 -0.387060 0.000114  
H -0.576486 1.621066 -0.000110  
H 1.598827 -0.181022 0.948783  
H 1.597834 -0.182722 -0.949141

H 0.107490 -1.135508 0.000439

**TS3**

C 0.011840 0.457840 0.016635  
C -1.225206 -0.216662 0.008829  
H -2.145548 0.348001 0.082017  
H -1.252058 -1.296222 -0.075921  
H 0.058941 1.546177 0.017082  
O 1.117787 -0.187001 -0.098128  
H 1.676561 -0.549018 0.609056

**TS4**

C 1.232351 -0.154900 0.027201  
C -0.030024 0.350228 0.119799  
H 2.064888 0.468136 0.339018  
H 1.411844 -1.142906 -0.401524  
H 0.589422 0.876280 -0.816202  
O -1.171203 -0.217289 0.027410  
H -1.910489 0.364838 -0.222573

**TS5**

C 1.245963 0.076104 0.000004  
C -0.156883 -0.298916 -0.000111  
O -1.251537 0.237677 0.000013  
H 1.326536 1.166013 -0.000445  
H 1.712603 -0.371624 0.883576  
H 1.713204 -0.372501 -0.882785  
H -1.274533 -0.986436 0.000189
